# Supplementary material for: Serum Gamma-Glutamyltransferase, Daily Alcohol Consumption, and the Risk of Chronic Kidney Disease: The Kansai Healthcare Study
Source: PubMed Central journal article supplement (PMC7064553; doi:10.2188/jea.je20180240), 2020-04-05
Supplement: je-30-163-s001.pdf [file je-30-163-s001.pdf]

**eTable 1.** Baseline characteristics of study participants for incident low eGFR according to quartile of baseline serum GGT

|                                                         | Total           | Quartile of serum GGT, IU/L |                      |                      |                         |
|---------------------------------------------------------|-----------------|-----------------------------|----------------------|----------------------|-------------------------|
|                                                         |                 | Quartile 1,<br>5–25         | Quartile 2,<br>26–39 | Quartile 3,<br>40–70 | Quartile 4,<br>71–1,530 |
| Number                                                  | 9,299           | 2,498                       | 2,205                | 2,276                | 2,320                   |
| Age, years                                              | 48.2 (4.2)      | 48.3 (4.2)                  | 48.3 (4.2)           | 48.2 (4.2)           | 48.0 (4.1)              |
| Body mass index, kg/m <sup>2</sup>                      | 23.2 (2.8)      | 22.2 (2.6)                  | 23.2 (2.8)           | 23.7 (2.8)           | 23.9 (3.0)              |
| Systolic blood pressure, mm Hg                          | 127.6 (17.7)    | 122.6 (16.4)                | 125.9 (17.0)         | 129.3 (17.2)         | 133.0 (18.3)            |
| Diastolic blood pressure, mm Hg                         | 79.7 (11.8)     | 76.5 (11.2)                 | 78.4 (11.4)          | 80.8 (11.6)          | 83.2 (11.9)             |
| Hypertension, <sup>a</sup> %                            | 28.2            | 18.5                        | 24.4                 | 31.2                 | 39.2                    |
| AST, IU/L                                               | 22 (19–28)      | 19 (17–22)                  | 21 (18–24)           | 24 (20–28)           | 28 (23–36)              |
| ALT, IU/L                                               | 23 (17–34)      | 17 (14–23)                  | 21 (16–28)           | 26 (19–36)           | 34 (25–48)              |
| Total cholesterol, mg/dL                                | 204.6 (33.2)    | 198.3 (31.1)                | 204.1 (31.9)         | 206.5 (32.5)         | 209.9 (35.9)            |
| Triglycerides, mg/dL                                    | 139.7 (111.9)   | 105.4 (73.1)                | 126.4 (86.3)         | 142.9 (102.8)        | 186.2 (152.8)           |
| High-density lipoprotein cholesterol, mg/dL             | 56.5 (14.8)     | 56.0 (14.1)                 | 55.8 (14.8)          | 56.1 (14.9)          | 58.2 (15.5)             |
| Low-density lipoprotein cholesterol, <sup>b</sup> mg/dL | 121.5 (31.0)    | 121.6 (28.9)                | 123.6 (30.0)         | 122.7 (30.9)         | 118.2 (34.2)            |
| Dyslipidemia, <sup>b, c</sup> %                         | 50.4            | 39.7                        | 48.1                 | 52.9                 | 61.8                    |
| Fasting plasma glucose, mg/dL                           | 97.2 (9.2)      | 95.1 (8.8)                  | 96.8 (8.8)           | 98.1 (9.2)           | 98.9 (9.6)              |
| eGFR, mL/min/1.73 m <sup>2</sup>                        | 84.8 (14.1)     | 84.8 (14.4)                 | 84.1 (13.9)          | 84.2 (13.8)          | 86.2 (14.1)             |
| Daily alcohol consumption, <sup>d</sup> g ethanol/day   | 23.0 (3.3–46.0) | 8.2 (0–23.0)                | 16.4 (3.3–32.9)      | 23.0 (14.8–46.0)     | 41.1 (23.0–46.0)        |
| Drinking habit, %                                       | 85.1            | 72.1                        | 83.4                 | 90.1                 | 95.7                    |
| Smoking habit                                           |                 |                             |                      |                      |                         |
| Non-smokers, %                                          | 21.1            | 24.0                        | 22.1                 | 21.0                 | 17.2                    |
| Past smokers, %                                         | 21.6            | 21.5                        | 20.0                 | 24.2                 | 20.6                    |

|                                           |      |      |      |      |      |
|-------------------------------------------|------|------|------|------|------|
| Current smokers, %                        | 57.3 | 54.5 | 57.9 | 54.8 | 62.2 |
| Regular leisure-time physical activity, % | 17.9 | 19.4 | 18.6 | 18.2 | 15.4 |

ALT, alanine aminotransferase; AST, aspartate aminotransferase; eGFR, estimated glomerular filtration rate; GGT, gamma-glutamyltransferase.

Note: Values are the mean (SD), the median (interquartile range) or the number (%).

<sup>a</sup>Hypertension: Systolic blood pressure  $\geq 140$  mm Hg or diastolic blood pressure  $\geq 90$  mm Hg.

<sup>b</sup>Low-density lipoprotein cholesterol levels were calculated by the Friedewald formula for subjects with triglyceride levels  $< 400$  mg/dL. We excluded 230 subjects with triglyceride levels  $\geq 400$  mg/dL.

<sup>c</sup>Dyslipidemia was defined as triglycerides  $\geq 150$  mg/dL, high-density lipoprotein cholesterol  $< 40$  mg/dL, low-density lipoprotein cholesterol  $\geq 140$  mg/dL, or use of oral lipid-lowering medications.

<sup>d</sup>Daily alcohol consumption: (the amount consumed per drinking day)  $\times$  (the drinking frequency per week)/7.
